# Supplementary material for: Development of Novel Monoclonal Antibodies to Wheat Alpha-Amylases Associated with Grain Quality Problems That Are Increasing with Climate Change
Source: MDPI journal article supplement (doi:10.3390/plants12223798), 2023-11-08
Supplement: s1 [file s1]

Supplemental Table S1: Primers used for cloning and RT-qPCR experiments.

| Primer Name        | Sequence 5'-3'           | Reference* |
|--------------------|--------------------------|------------|
| Amy1_F_Court3      | ATGGCGAACAACACTCGTCC     |            |
| Amy1_R_Court3      | TCATATTTTCTCCCATACGGCA   |            |
| Amy2_F_Court3      | ATGGGGAGGAACGGCAAC       |            |
| Amy2_R_Court3      | TCAGCTCCGTTGCAGTGTC      |            |
| Amy4_F_Court3      | ATGGGGAGGCAGATCG         |            |
| Amy4_R_Court3      | CTAGCGCCGCCCGGC          |            |
| F_Amy1_ResBgl      | GCAGATCTCGCCCTTATGG      |            |
| R_Amy1_ResEco      | GCCAGTGTGCTGGAATTC       |            |
| M13F               | GTAAAACGACGGCCAG         | [60]       |
| M13T               | CAGGAAACAGCTATGAC        | [60]       |
| T7F                | TAATACGACTCACTATAGGG     | [61]       |
| T7R                | CTAGTTATTGCTCAGCGGT      | [61]       |
| FAmy1Int_t7term    | GCAAGGTCATCGTCAAGC       |            |
| RAmy1Int_t7prom    | TCCACCTTGCCCATCAG        |            |
| Amy1F_Court4       | GGCTCTACGACCTGGA         |            |
| Amy1R_Court5       | GGGTGCGTGAGGATG          |            |
| Amy1F_CourtINT     | GAAGCAAGAGATCAACGC       |            |
| Amy1R_CourtINT     | GCCCATCAGGAAGTTGTAC      |            |
| Amy2F_CourtINT     | TGAAGATCGGGTCCAGGTAC     |            |
| Amy2R_CourtINT     | GTGGTTGCCGTTCTCTCC       |            |
| Amy2F_CourtINT2    | CGATCAGCCGCCACAGC        |            |
| Amy2R_CourtINT2    | GCTGCGCCGACTACAAGGAC     |            |
| Amy4F_CourtINT     | CGGAGAGCGACATGTACG       |            |
| Amy4R_CourtINT     | CTTGAGCATGTTGTACCAGCC    |            |
| Amy4F_Court4       | GCTCTACGACCTGGACG        |            |
| Amy4R_Court4       | CGTAGCCCATCATGACCTTG     |            |
| RT-qPCR TaACT-F    | TCAGCCGAGCGGGAAATTGT     | [9]        |
| RT-qPCR TaACT-R    | CCTCTCTGCGCCAATCGT       | [9]        |
| RT-qPCR TaAMY1-F   | TTCAACTGGGAGTCGTGGAA     | [9]        |
| RT-qPCR TaAMY1-R   | CACCTTGCCCATCAGGAAGT     | [9]        |
| RT-qPCR TaAMY2-F   | GGCCACCAAGTCCTCTTTCA     | [9]        |
| RT-qPCR TaAMY2-R   | CACCTTGCCCGTCATCATGT     | [9]        |
| RT-qPCR TaAMY3-F   | TTCTTTTCCAGGGGTTTAATTGGG | [9]        |
| RT-qPCR TaAMY3-R   | CTCCACCTTCCCTTGCATGA     | [9]        |
| RT-qPCR TaAMY3-GBF | ATCGTGGAAGACACAAGG       |            |
| RT-qPCR TaAMY3-GBR | CTTGAGTTGAGGTTGTAGAG     |            |
| RT-qPCR TaAMY4-F   | GAGGATGCGGGACAAGGAG      | [9]        |
| RT-qPCR TaAMY4-R   | AACGGCCATTTCTTCTGCGA     | [9]        |

\* Unreferenced primers listed are novel.
